# Supplementary material
Source: Research Square preprint supplement (doi:10.21203/rs.3.rs-9722327/v1)
Supplement: Supplementary file 1 [file 5a7312cb74223ab0cb894b2c.docx]

**Supplementary figures**

**Figure S1.** Euler diagram of Diptera morphospecies overlap among management categories. Set size indicates the total number of morphospecies in each management category, and overlap regions indicate the number of shared morphospecies. The underlying data are reported in Table S1.

**Figure S2.** Chord diagram of Diptera family composition by management category based on richness. Chords connect management categories to Diptera families, and chord width is proportional to the number of morphospecies recorded in each family. The underlying edge list is provided in Table S2.

**Figure S3.** Chord diagram of Diptera family composition by management category based on abundance. Chords connect management categories to Diptera families, and chord width is proportional to total abundance within each family. The underlying edge list is provided in Table S3.

**Figure S4.** Chord diagram of Diptera guild composition by management category based on abundance. Chords connect management categories to ecological guilds, and chord width is proportional to total abundance within each guild. The underlying edge list is provided in Table S4.

**Figure S5.** Distance-based redundancy analysis (dbRDA) of plot-level Diptera community composition conditioned on village. Points represent plots, and colors indicate management category. Statistical results are reported in Table S5.

**Figure S6.** Management contrasts for predator Diptera at the plot level. Points show estimated contrasts on the link scale for AF – CO, FC – CO, and DP – CO, and horizontal lines show 95% confidence intervals. Separate panels present abundance and species richness. Full coefficient estimates are reported in Table S7.

**Figure S7.** Scale-dependent landscape effects on predator Diptera. Forest plots show model coefficients for agricultural cover, agricultural edge, SHDI, seminatural habitat cover, and seminatural habitat edge measured within 250 m, 500 m, and 1000 m buffers. Points indicate coefficient estimates on the link scale, and horizontal lines indicate 95% confidence intervals. Detailed coefficients are provided in Table S10.

**Supplementary tables**

**Table S1.** Set sizes used to construct the Euler diagram of Diptera morphospecies across management categories. The table reports the number of morphospecies recorded within each management category and the set information underlying Figure S1.

**Table S2.** Edge list for the chord diagram of Diptera family composition by management category based on richness. Each row represents a management–family link, and the associated value gives family-level richness. These data underlie Figure S2.

**Table S3.** Edge list for the chord diagram of Diptera family composition by management category based on abundance. Each row represents a management–family link, and the associated value gives total abundance. These data underlie Figure S3.

**Table S4.** Edge list for the chord diagram of Diptera guild composition by management category based on abundance. Each row represents a management–guild link, and the associated value gives total abundance. These data underlie Figure S4.

**Table S5.** Analysis of variance results for the dbRDA of plot-level Diptera community composition. The table reports the constrained ordination test evaluating management effects after conditioning on village. These results correspond to Figure S5.

**Table S6.** Benjamini–Hochberg-adjusted pairwise comparisons for beta-diversity components among management categories. The table lists pairwise post hoc comparisons for nestedness (βsne), total dissimilarity (βsor), and turnover (βsim), together with adjusted p-values. These results complement Figure 1b and Table 1B.

**Table S7.** Estimated management contrasts for Diptera guild abundance and species richness relative to the control category. The table reports effect sizes on the link scale, standard errors, confidence intervals, and p-values for AF, FC, and DP relative to CO. These estimates correspond to Figures 2a–2c and Figure S6.

**Table S8.** Model status summary for management-only guild response models. The table reports the final status of each fitted management-only model, including the selected family, zero-inflation structure where applicable, and model validity information.

**Table S9.** Candidate model set for management-only guild response analyses. The table lists all candidate models evaluated for the management-only analyses, including tested distributions, zero-inflation specifications, and model selection statistics.

**Table S10.** Full coefficient estimates for scale-dependent landscape models of Diptera guild abundance and species richness. The table reports coefficient estimates, standard errors, confidence intervals, p-values, and model support information for each guild, response variable, spatial scale, and landscape predictor. These values underlie Figures 3a–3c and Figure S7.

**Table S11.** Model status summary for scale-dependent landscape analyses. The table reports the fitting status of each landscape model across guilds, response variables, scales, and predictors, including selected model family and support relative to the base model.

**Table S12.** Candidate model set for scale-dependent landscape analyses. The table lists all candidate models evaluated in the landscape analyses, including tested distributions, zero-inflation specifications, model selection statistics, and validity diagnostics.

**Table S13.** Complete edge list for the Diptera co-occurrence network under adoptive farmer management (AF). Each row represents a retained significant association between two morphospecies, together with the correlation coefficient, adjusted p-value, interaction type, and edge weight. These data correspond to Figure 4a.

**Table S14.** Complete edge list for the Diptera co-occurrence network under demoplot management (DP). Each row represents a retained significant association between two morphospecies, together with the correlation coefficient, adjusted p-value, interaction type, and edge weight. These data correspond to Figure 4c.

**Table S15.** Complete edge list for the Diptera co-occurrence network under farmer champion management (FC). Each row represents a retained significant association between two morphospecies, together with the correlation coefficient, adjusted p-value, interaction type, and edge weight. These data correspond to Figure 4b.
